P1968

# Five-year outcomes in patients with diabetes mellitus treated with biodegradable polymer sirolimus-eluting stents versus durable polymer everolimus-eluting stents

J.F. Iglesias<sup>1</sup>, D. Heg<sup>2</sup>, M. Roffi<sup>1</sup>, D. Tueller<sup>3</sup>, J. Lanz<sup>4</sup>, F. Rigamonti<sup>1</sup>, O. Muller<sup>5</sup>, I. Moarof<sup>6</sup>, S. Cook<sup>7</sup>, D. Weilenmann<sup>8</sup>, C. Kaiser<sup>9</sup>, M. Valgimigli<sup>4</sup>, P. Jueni<sup>10</sup>, S. Windecker<sup>4</sup>, T. Pilgrim<sup>4</sup>

<sup>1</sup>Geneva University Hospitals, Cardiology, Geneva, Switzerland; <sup>2</sup>Bern University Hospital, Institute of Social and Preventive Medicine and Clinical Trials Unit, Bern, Switzerland; <sup>3</sup>Triemli Hospital, Cardiology, Zurich, Switzerland; <sup>4</sup>Bern University Hospital, Cardiology, Bern, Switzerland; <sup>5</sup>University Hospital Centre Vaudois (CHUV), Cardiology, Lausanne, Switzerland; <sup>6</sup>Cantonal Hospital Aarau, Cardiology, Aarau, Switzerland; <sup>7</sup>University of Fribourg, Cardiology, Fribourg, Switzerland; <sup>8</sup>Kantonhospital, Cardiology, St Gallen, Switzerland; <sup>9</sup>University Hospital Basel, Cardiology, Basel, Switzerland; <sup>10</sup>St. Michael's Hospital, Applied Health Research Centre, Li Ka Shing Knowledge Institute, Department of Medicine, Toronto, Canada

**Funding Acknowledgement:** BIOSCIENCE was an investigator-initiated trial supported by a dedicated research grant from Biotronik, Bülach, Switzerland

**Background:** Patients with diabetes mellitus (DM) remain at higher risk for adverse events after percutaneous coronary intervention (PCI) compared with non-diabetic individuals. Among available drug-eluting stents (DES), thin-strut durable polymer everolimus-eluting stents (DP-EES) were shown to provide the best safety and efficacy profile in diabetics. Whether biodegradable polymer DES provide additional long-term clinical benefit compared with DP-EES among diabetic patients remains uncertain.

**Purpose:** To compare the long-term performance of ultrathin-strut biodegradable polymer sirolimus-eluting stents (BP-SES) versus DP-EES for PCI in patients with insulin-requiring and non-insulin-requiring DM.

**Methods:** We performed a prespecified subgroup analysis of the randomized, multicenter, non-inferiority BIOSCIENCE trial (NCT01443104). Patients with stable coronary artery disease or acute coronary syndrome were randomly assigned to treatment with ultrathin-strut BP-SES or thin-strut DP-EES. Patients were further divided according to diabetic status. The primary endpoint was target lesion failure (TLF), a composite of cardiac death, target-vessel myocardial infarction (MI) and clinically-indicated target lesion revascularization (TLR), within 12 months.

**Results:** Among 2'119 patients enrolled between March 2012 and May

2013, 486 (22.9%) presented with DM (insulin-requiring, 33.1%). Compared with non-diabetics, patients with DM were older and had a greater baseline cardiac risk profile, including higher prevalence of hypertension, hypercholesterolaemia, peripheral artery disease, chronic renal failure and prior PCI, coronary artery bypass graft surgery, or stroke. At 5 years, TLF occurred similarly in 74 patients (cumulative incidence, 31.0%) treated with BP-SES and 57 patients (25.8%) treated with DP-EES (RR 1.23; 95% CI 0.87–1.73;  $p=0.24$ ) in diabetics, and in 124 patients (16.8%) treated with BP-SES and 132 patients (16.8%) treated with DP-EES (RR 0.98; 95% CI 0.77–1.26;  $p=0.90$ ) in non-diabetics ( $p$  for interaction=0.31). Cumulative incidences of cardiac death (14.9% vs. 9.5%;  $p=0.10$ ), target-vessel MI (11.4% vs. 11.0%;  $p=0.81$ ), clinically-indicated TLR (16.9% vs. 15.8%;  $p=0.68$ ), and definite thrombosis (3.0% vs. 2.5%;  $p=0.63$ ) at 5 years were similar among diabetic patients treated with ultrathin-strut BP-SES or thin-strut DP-EES. Overall, there was no interaction between diabetic status and treatment effect of BP-SES versus DP-EES.

**Conclusion:** In a prespecified subgroup analysis of the BIOSCIENCE trial, we found no difference in clinical outcomes throughout five years between diabetic patients treated with ultrathin-strut BP-SES or thin-strut DP-EES.
